# Supplementary material for: Solar Pumps and Water-Energy Nexus in Gujarat, India:First Assessment of the World’s Largest Pilot on Grid-connected Solar Irrigation Pumps
Source: Research Square preprint supplement (doi:10.21203/rs.3.rs-658617/v1), 2021-07-14
Supplement: Supplementary file 1 [file 9b248f17b31a575f87717f01.docx]

SKY Assesment

Annexure 1

Gains From Migrating Metered and Unmetered Tubewells to PMKUSUM COI and PMKUSUM COII

In annexure table A and B, we evaluate financial impact on the Utility and farmer of migrating a 15 HP tubewell to PMKUSUM-COI and PMKUSUM-COII. In doing this, key assumptions made are: [a] unmetered connections will remain unmetered and pay US $ 9.2/ HP for the next 25 years, which is the economic life of solar pump; likewise, metered tubewells will pay US $ 8.33/MWh for the next 25 years; [b] marginal productivity of electricity in irrigation or water sale is US $ 55.6/MWh; [c] average unmetered and metered connection are sent 1855 kWh/HP and 719 kWh/HP of power respectively (CAG 2016); [d] average distribution loss on agriculture feeder is 20 percent; [e] upon migration to PMKUSUM-C, the consumer instantly begins behaving as if operating a metered solar connection with the option to sell surplus energy at US $ 39.3/MWh; [f] solar tubewells consume 575 kWh/HP (0.8 *719) equivalent to that of metered tubewells paying US $ 8.33/MWh; [g] cost to serve grid power is US $ 81.94/MWh; [f] the cost of solarisation is US $ 555.6/kWp, average solar generation is 1500 kWh/kWp/year and discount rate applicable is 10 percent/year.

Table A: Impact of Migrating 15 HP *Unmetered* Tubewell to PMSUSUM-COI & COII

|  |  | 1 | 2 | 3 |
| --- | --- | --- | --- | --- |
|  |  | Unmetered Tubewell  (15 HP) | [1] migrates to  PMKUSUM-COI (panels=19.7 kWp) | [1] migrates to  PMKUSUM-COII-UNMETERED  (panels= 11.25kWp) |
| 1 | Total capital cost (US $) | 0 | 10944.4 | 6250 |
| 2 | MNRE, GoI subsidy (30%) (US$) | 0 | 3277.8 | 1875 |
| 3 | GoG subsidy (US$) | 0 | 3277.8 | 4375 |
| 4 | Farmer contribution (US$) | 0 | 3.16 | 0 |
| 5 | Power consumption (KWh/year) | 27495[[1]](#footnote-1) | 8628[[2]](#footnote-2) | 8628 |
| 6 | Utility’s gain(+)/ loss (-) on power sales (US$ year) | -2111.1[[3]](#footnote-3) | +2111.1[[4]](#footnote-4) | +2111.1 |
| 7 | Utility’s gain on solar power purchase (US$/year) | 0 | +0.64[[5]](#footnote-5) | +0.25[[6]](#footnote-6) |
| 8 | Consumer’s incremental gain from energy consumption & sale (US$/year) | +1388.9[[7]](#footnote-7) | +1305.6[[8]](#footnote-8) | +1138.9[[9]](#footnote-9) |
| 9 | NPV for the Utility (US$)  [payback period for GoG & MNRE in months[[10]](#footnote-10)] | -19166.7[[11]](#footnote-11) | +23944.4[[12]](#footnote-12)  [26.2] | +17916.7  [30.5] |
| 10 | NPV for consumer (US$)  [payback period for consumer in months] | +12597.2 | +7458.3  [40.3] | +10333.3  [0] |

Table B Financial Impact of Migrating a 15 HP Metered Tubewell to PMSUSUM-C Option I and PMKUSUM-C-Option II and 95% subsidy on solar pump in lieu of waitlisted grid connection

|  |  | 1 | 2 | 3 | 4 |
| --- | --- | --- | --- | --- | --- |
|  |  | Metered Tubewell  (15 HP) | [1] onboards  PMKUSUM-C Option I  (panels=19.7 kWp) | [1] onboards  PMKUSUM-C  Option II-METERED  (panels= 11.25 kWp) | PMKUSUM-B  Three 5 HP solar pumps in lieu of metered pumps  (Panels:11.25 kWp) |
| 1 | Total capital cost (US $) | 0 | 10944.4 | 6250 | 6250 |
| 2 | MNRE subsidy (30%) (US $) | 0 | 3277.8 | 1875 | 1875 |
| 3 | GoG subsidy (US $) | 0 | 3277.8 | 4375 | 4055.6 |
| 4 | Farmer contribution (US $) | 0 | 4388.9 | 0 | 319.4 |
| 5 | Power consumption (KWh/year) | 10785[[13]](#footnote-13) | 8628[[14]](#footnote-14) | 8628 | 8628[[15]](#footnote-15) |
| 6 | Utility’s gain(+)/ loss (-) on power sales (US $ year) | -791.7[[16]](#footnote-16) | +791.7 | +791.7 | +791.7 |
| 7 | Utility’s gain on solar power purchase (US$/year) | 0 | +888.9[[17]](#footnote-17) | +347.2[[18]](#footnote-18) | 0 |
| 8 | Consumer’s incremental gain from energy/water sale (US $/year) | +597.2[[19]](#footnote-19) | +1395.6[[20]](#footnote-20) | +1138.9[[21]](#footnote-21) | +486.1 |
| 9 | NPV for Utlity (US $)  Payback for GoG & MNRE [months] | -7180.6[[22]](#footnote-22) | +1197.2  [46.8] | +5958.3  [66]] | +3125  [89.9] |
| 10 | NPV for consumer over 25 years @ 10%/year (Rs lakh) | +5416.7 | +7458.3  [40.3] | +10333.3  [0] | +4097.2  [7.9] |

1. Assuming CAG (2016) figure of 1833 kWh/HP sent out to unmetered tubewells which includes 20 percent losses [↑](#footnote-ref-1)
2. Assuming CAG (2016) figure of 719 kWh/HP sent out when metered tariff is US $ 8.33/MWh. The consumption is 719*0.8 =575 kWh/HP given 20 % distribution loss. [↑](#footnote-ref-2)
3. Power supplied valued at US $ 81.94/MWh and flat tariff deducted at US $ 9.24/HP (27495* 0.082)-(9.24*15) [↑](#footnote-ref-3)
4. DISCOM saves the cost of sending 27495 kWh but also loses flat tariff. [↑](#footnote-ref-4)
5. Generation assumed at 1500 kWh/kWp; {(1500*19.7) -8628}(0.082-0.039) [↑](#footnote-ref-5)
6. {(11.25*1500)-8628}(0.082-0.039) [↑](#footnote-ref-6)
7. Assumed that tubewell owner earns a net income of US $ 55.6/MWh in own irrigation or water sales after all transaction costs are met net of flat tariff [(27495*0.0556)-(9.24*15)] [↑](#footnote-ref-7)
8. {(19.7*1500)-8628}0.039 + (8628*0.0556) [↑](#footnote-ref-8)
9. {(15*1500)0.039-8628}+(8628*0.0556) [↑](#footnote-ref-9)
10. Computed for the combined investment by MNRE as well as GoG; e.g., for PMKUSUM COI, [(3277.8+3277.8)/(2111.1+888.9]*12 [↑](#footnote-ref-10)
11. Computed using <https://www.calculatorsoup.com/calculators/financial/net-present-value-calculator.php> [↑](#footnote-ref-11)
12. PV of US $ 3000/year over 25 years @ 10% less US$ 3277.8 [↑](#footnote-ref-12)
13. Assuming CAG (2016) figure of 719 kWh/HP including 20 percent distribution losses. [↑](#footnote-ref-13)
14. Assuming no change in pumping behaviour despite opportunity to sell saved power at US $ 39.3/MWh. The only benefit claimed is 20 percent saving in line losses; the consumption is 719*0.8 =575 kWh/HP. SKY showed increase in consumption/HP likely because of 12 hours/day power supply. This will now reduce to 8 hours daily. [↑](#footnote-ref-14)
15. Off-grid solar pumps could behave like unmetered tubewells; however, we have taken here metered consumption since these are subsidized to save new metered connections. GoG-DISCOM notional gain is grid power they would be supplied under metered connection. [↑](#footnote-ref-15)
16. Power supplied is valued at US $ 81.9/MWh less US $ 8.3/MWh metered tariff) [↑](#footnote-ref-16)
17. Generation assumed at 1500 kWh/kWp; {(1500*19.7) -8628}(0.082- 0.039) [↑](#footnote-ref-17)
18. {(11.25*1500)-8628}(0.082- 0.039) [↑](#footnote-ref-18)
19. Assumed that tubewell owner earns a net income of US $ 55.6/MWh in own irrigation or water sales after all transaction costs are met net of flat tariff [↑](#footnote-ref-19)
20. {(19.7*1500)-8628}0.039 + (8628*0.0556) [↑](#footnote-ref-20)
21. {(11.25*1500)-8628}0.039+(8628*0.0556) [↑](#footnote-ref-21)
22. Computed using <https://www.calculatorsoup.com/calculators/financial/net-present-value-calculator.php> [↑](#footnote-ref-22)
